# Supplementary figures and images for: IMatter: validation of the NHS Scotland Employee Engagement Index
Source: Springer Nature journal article supplement (doi:10.1186/s12913-014-0535-z), 2014-11-07

INPUT: 1192 Persons 25 Items

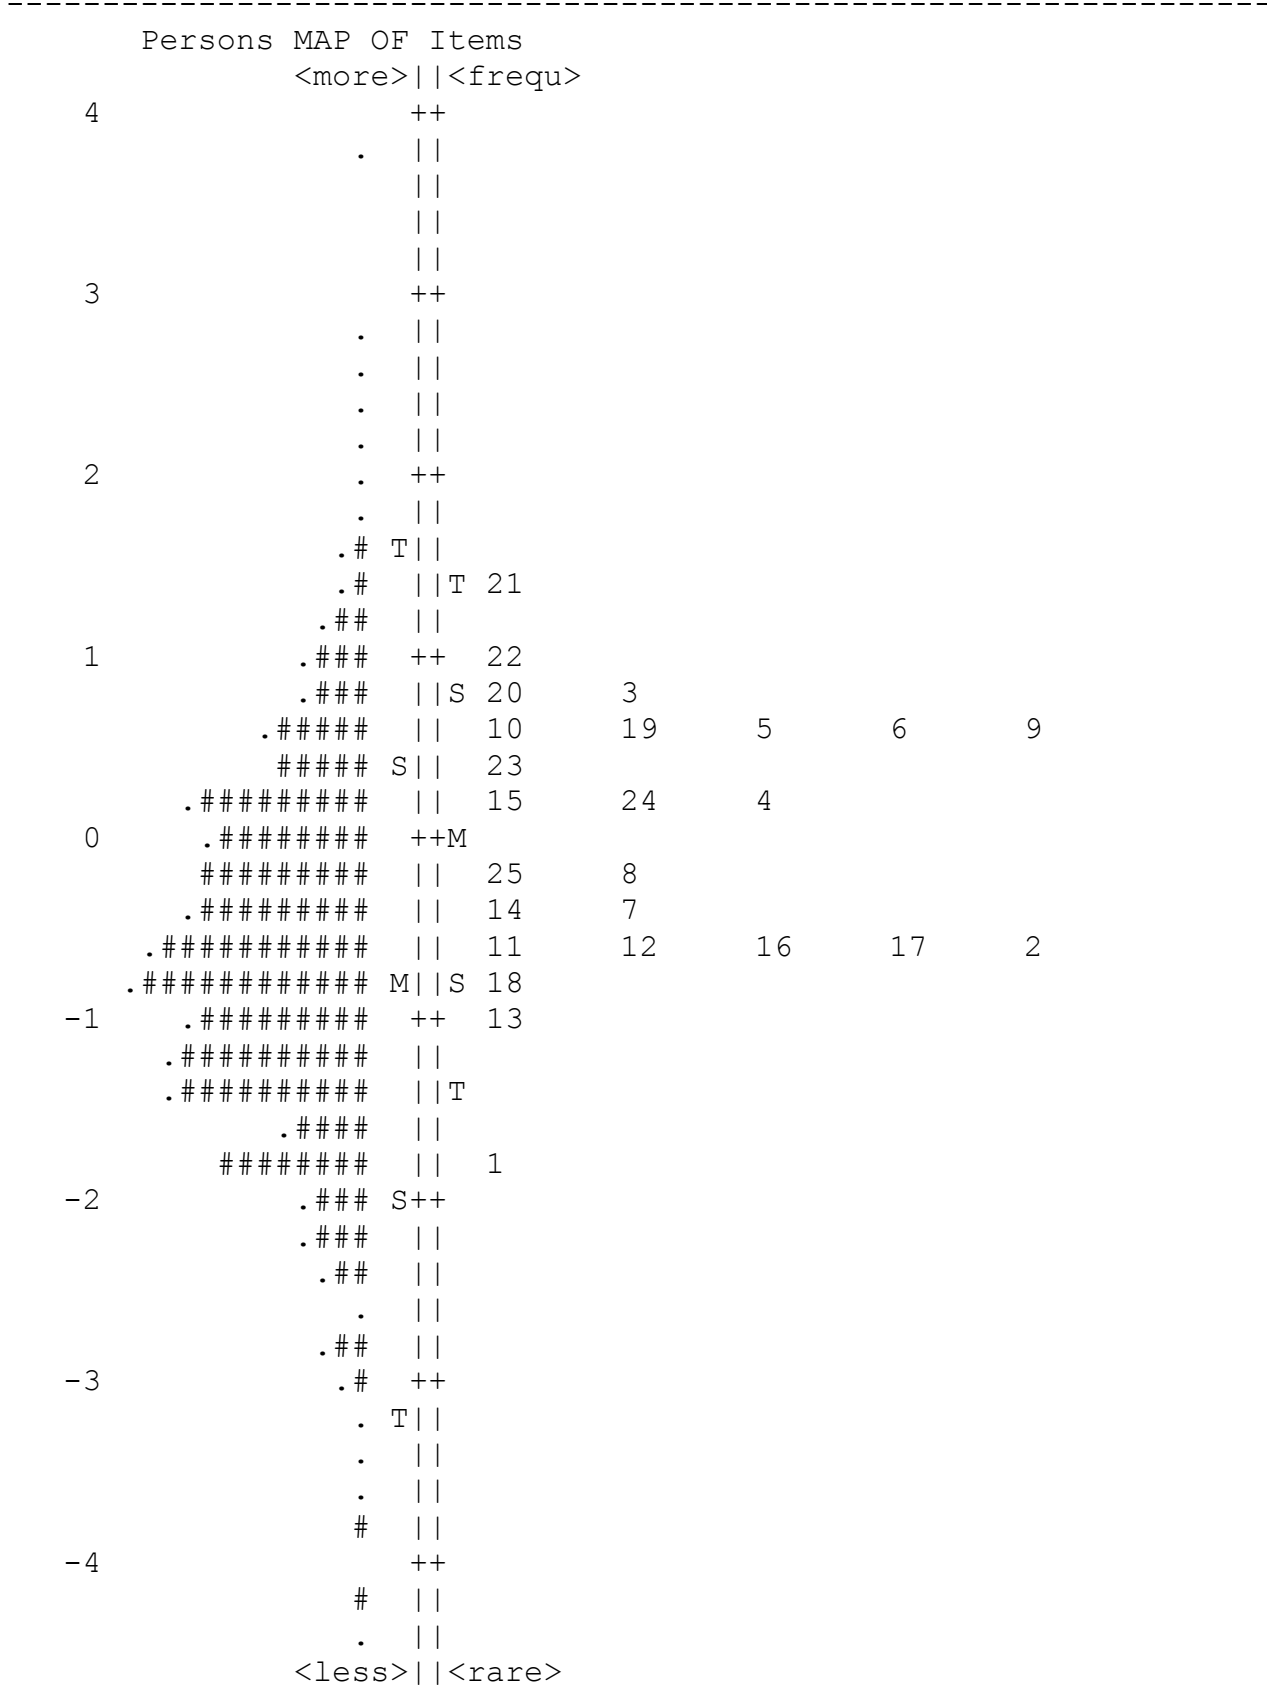

EACH '#' IS 8.

Figure 5. Person ability and item difficulty

Supplement: MOESM5 [file 9756652]
